# Supplementary material for: Unravelling the one-pot conversion of biomass-derived furfural and levulinic acid to 1,4-pentanediol catalysed by supported RANEY® Ni–Sn alloy catalysts
Source: Royal Society of Chemistry journal article supplement (doi:10.1039/d1ra06135f), 2021-12-20
Supplement: d1ra06135f1.pdf [file d1ra06135f1.pdf]

Electronic Supplementary Information for

## Unravelling the one-pot conversion of biomass-derived furfural and levulinic acid to 1,4-pentanediol catalysed by supported RANEY® Ni-Sn alloy catalysts

Rodiansono,<sup>\*a,b</sup> Maria Dewi Astuti,<sup>a</sup> Kamilia Mustikasari,<sup>a</sup> Sadang Husain,<sup>c</sup> Fathur Razi Ansyah,<sup>d</sup> Takayoshi Hara,<sup>e</sup> and Shogo Shimazu<sup>e</sup>

<sup>a</sup>Department of Chemistry, Lambung Mangkurat University, Jl. A. Yani Km 36 Banjarbaru, Indonesia 70714.

<sup>b</sup>Catalysis for Sustainable Energy and Environment (CATSuRe), Wetland-based Lambung Mangkurat University.

<sup>c</sup>Department of Physics, Lambung Mangkurat University, Jl. A. Yani Km 36 Banjarbaru, Indonesia 70714.

<sup>d</sup>Department of Mechanical Engineering, Lambung Mangkurat University, Jl. A. Yani Km 35.5 Banjarbaru, Indonesia 70714.  
Graduate School of Engineering, Chiba University, 1-33 Yayoi, Inage-ku, Chiba, Japan 263-8522

\*Corresponding author: rodiansono@ulm.ac.id (R. Rodiansono); Tel./fax.: +62 511 477 3112

### Contents

1. Experimental sections (catalyst preparation, characterization, and procedure of catalytic activity tests).
2. The bulk composition of the catalysts, H<sub>2</sub> uptake, average Ni(111) crystallites sizes, specific surface area ( $S_{\text{BET}}$ ), and the amount of acids sites (**Table S1**).
3. Physico-chemical properties of synthesised RNi-Sn(x)/AA catalysts (x = 3.0; 1.4; and 1.0) after reduction with H<sub>2</sub> at different temperature of 673–873 K for 1.5 h (**Table S2**).
4. Results of catalytic conversion of FFald to 1,4-PeD over various bimetallic Raney® Ni-based supported on aluminium hydroxide (AlOH) catalysts (**Table S3**).
5. Results of catalytic conversion of FFald to 1,4-PeD over RNi-Sn(x)/AA catalysts (x = 7.9; 3.7; and 1.0) after reduction with H<sub>2</sub> at 673-873 K for 1.5 h (**Table S4**).
6. Results of the selective synthesis of 1,4-PeD from FFald using various supported Ni-Sn(1.5) (Ni<sub>3</sub>Sn<sub>2</sub>) alloy catalysts (**Table S5**).
7. XRD patterns of various supported RANEY® Ni catalysts (**Fig. S1**).
8. XRD patterns of the as-prepared RANEY® Ni/AlOH catalyst (a) without and (b) hydrothermally treated at 423 K for 2 h (**Fig. S2**).
9. The XRD patterns of (a) Raney®Ni, (b) RNi/AlOH, and RNi-Sn(x)/AlOH with different Ni/Sn molar ratio of (c) 7.9 mmol, (d) 3.0, (e) 1.4, and (f) 1.0 mmol (**Fig. S3**).
10. XRD patterns of as-prepared RNi-Sn(7.9)/AlOH catalyst and after reduction with H<sub>2</sub> at 673-873 K for 1.5 h (**Fig. S4**).
11. XRD patterns of the as-prepared RNi-Sn(3.0)/AlOH catalyst and after reduction with H<sub>2</sub> at 673-873 K for 1.5 h (**Fig. S5**).
12. XRD patterns of the as-prepared RNi-Sn(1.4)/AlOH catalyst and after reduction with H<sub>2</sub> at 673-873 K for 1.5 h (**Fig. S6**).
13. XRD patterns of the as-prepared RNi-Sn(1.0)/AlOH catalyst and after reduction with H<sub>2</sub> at 673-873 K for 1.5 h (**Fig. S7**).
14. XRD patterns of the RANEY® Ni-Sn(1.5)/C and RANEY® Ni-Sn(1.5)/SiO<sub>2</sub> catalysts after reduction with H<sub>2</sub> at 673 K for 1.5 h. (**Fig. S8**).
15. The XRD patterns of various supported Ni-Sn(1.5) (Ni<sub>3</sub>Sn<sub>2</sub>) (a) c-AlOH, (b)  $\gamma$ -Al<sub>2</sub>O<sub>3</sub>, (c) active carbon (AC), and (d) MgO after reduction with H<sub>2</sub> at 673 K for 1.5 h. The plotted data were compared with JCPDS card of #06-414 (Ni<sub>3</sub>Sn<sub>2</sub>) (**Fig. S9**).
16. XRD patterns of various supported Ni-Sn(1.5) (Ni<sub>3</sub>Sn<sub>2</sub>) catalysts after reduction with H<sub>2</sub> at 673 K for 1.5 h. The plotted data were compared with JCPDS card of #06-414 (Ni<sub>3</sub>Sn<sub>2</sub>) (**Fig. S10**).
17. XRD patterns of recovered RNi-Sn(3.0)/AlOH and RNi-Sn(1.4)/AlOH after the second run of reusability tests in the catalytic conversion of FFald to 1,4-PeD. The recovered catalysts were dried in vacuo at room temperature for overnight (**Fig. S11**).

## 1. Experimental sections

### 1.1. Materials

Raney Ni–Al was purchased from Kanto Chemical Co. Inc. (50%wt Ni+ 50%wt Al = 50:50). Tin dihydrate ( $\text{SnCl}_2 \cdot 2\text{H}_2\text{O}$ , 99%), NaOH (97%),  $\text{SnCl}_2 \cdot 2\text{H}_2\text{O}$  (99.9%), ethylene glycol (99.5%), ethanol (99.5%), and 2-methoxyethanol (99.8%) were purchased from WAKO Pure Chemical Co. and used as received. Furfuraldehyde (98%), furfuryl alcohol (97%), 2-methylfuran (98%), tetrahydrofurfuryl alcohol (99%), levulinic acid (98%), and  $\gamma$ -valerolactone (99%) were purchased from Tokyo Chemical Industry Co. All organic chemical compounds were purified using standard procedures prior to use. Active carbon (AC,  $S_{\text{BET}} = 815 \text{ m}^2\text{g}^{-1}$ ), and aluminium hydroxide (*c*-AlOH) were purchased and used as received from WAKO Pure Chemical Industries, Ltd. unless otherwise stated.  $\text{SiO}_2$  ( $S_{\text{BET}} = 200 \text{ m}^2\text{g}^{-1}$ ) and  $\gamma\text{-Al}_2\text{O}_3$  ( $S_{\text{BET}} = 100 \text{ m}^2\text{g}^{-1}$ ) were purchased from Japan Aerosil Co. Lithium-taenolite (TN), sodium-Bentonite (BNT), lithium- hectorite (HT) and smectite SA (SMT) were donated by Kunimine Industries Co. Ltd.

### 1.2. Catalyst preparation

**RANEY® Ni.** Typical procedure for the synthesis of the conventional RANEY® Ni is described as follows:<sup>1–3</sup> RANEY Ni-Al alloy powder (1.0 g) was slowly added to an aqueous solution of NaOH (6 M, 10 mL) at 363 K under gentle stirring and was kept on stirring for 30 min for further alkali leaching. The precipitated was washed by distilled water until the supernatant became neutral and then stored under water for activity test.

**Supported RANEY® Ni.** Typical procedure for the synthesis of the supported RANEY® Ni is described as follows:<sup>2,3</sup> RANEY Ni-Al alloy powder (1.0 g) was slowly added to an aqueous solution of NaOH (6 M, 10 mL) at 363 K under gentle stirring and was kept on stirring for 30 min for further alkali leaching, then washed with deionized water and ethanol until the filtrate was neutralized then the clay or active carbon (AC) was added slowly and stirred for overnight at room temperature. The mixture was transferred into a sealed-Teflon autoclave reactor for hydrothermal treatment at 423 K for 2 h. The solvent was removed by simple centrifugation then dried under vacuum for overnight. Prior to safety use (pyrophoricity), the supported RANEY® Ni/AC was examined by heating up under air and it was found to be nonpyrophoric. In the case of RANEY® Ni, the catalyst was stored in  $\text{H}_2\text{O}$  and used as slurry to prevent the oxidation with air during handling. In addition, metal oxides or acidic co-catalysts were added by simple mixing at room temperature without further treatment.

**Synthesis of supported RANEY® Ni–Sn (1.5) catalysts.** Typical procedure for the synthesis of the supported Raney® Ni-Sn/AC is described as follows:<sup>2,3</sup> Supported RANEY® Ni/AC that was obtained from the above procedure was mixed with an ethanol solution that contained 2.30 mmol  $\text{SnCl}_2 \cdot 2\text{H}_2\text{O}$  (to keep the Ni/Sn molar ratio of approximately 1.5) at room temperature and stirred for 2 h. The mixture was then placed into a sealed-Teflon autoclave reactor for the hydrothermal treatment at 423 K for 2 h. The resulting precipitate was filtered, washed with distilled water until the filtrate was neutralized, and then stored in water. The catalyst was reduced with  $\text{H}_2$  at 673 K for 1.5 h prior to catalytic reaction.

**Synthesis of RANEY® Ni/AlOH.** Typical procedure of the synthesis of Raney nickel supported on aluminium hydroxide catalyst (denoted as RANEY® Ni/AlOH or RNi/AlOH) is described as follows:<sup>4</sup> RANEY® Ni-Al alloy powder (1.0 g) was slowly added to a dilute aqueous solution of NaOH (0.31 M, 8 mL) at room temperature. The temperature was raised to 363 K and 1 mL of 3.1 M NaOH solution was subsequently added and stirred for 30 min. The mixture was placed into a sealed-Teflon autoclave reactor for hydrothermal treatment at 423 K for 2 h. The resulting precipitate was filtered, washed with distilled water until filtrate was neutralized, and then stored in water. The catalyst was dried under vacuum before the catalytic reaction.

**Synthesis of RNi–Sn(x)/AlOH and RNi–Sn(x)AA.** Typical procedure of the synthesis of RANEY® nickel-tin alloy supported on aluminium hydroxide (denoted as RNi-Sn(3.0)/AlOH; 3.0 is Ni/Sn molar ratio (Sn loading amount = 1.04 mmol) is described as the follows:<sup>5,6</sup> RANEY® Ni/AlOH that was obtained from the above procedure was mixed with an ethanol solution that contained 1.04 mmol  $\text{SnCl}_2 \cdot 2\text{H}_2\text{O}$  at room temperature and stirred for 2 h. The mixture was then placed into a sealed-Teflon autoclave reactor for the hydrothermal treatment at 423 K for 2 h. The resulting precipitate was filtered, washed with distilled water until the filtrate was neutralized, and then stored in water. The catalyst was dried under vacuum before the catalytic reaction. The RNi–Sn(x)/AlOH was reduced with  $\text{H}_2$  at 673–873 K for 1.5 h and produced RNi–Sn(x)/AA (AA = amorphous alumina).

### 1.3. Catalyst characterisation

XRD measurements were recorded on a Mac Science M18XHF instrument using monochromatic  $\text{CuK}\alpha$  radiation ( $\lambda = 0.15418 \text{ nm}$ ). The XRD was operated at 40 kV and 200 mA with a step width of  $0.02^\circ$  and a scan speed of  $4^\circ \text{ min}^{-1}$  ( $\alpha_1 = 0.154057 \text{ nm}$ ,  $\alpha_2 = 0.154433 \text{ nm}$ ). The formation of Ni-Sn alloy for every sample was confirmed by JCPDS card. The mean crystallite sizes of Ni–Sn was calculated from the full width at half maximum (FWHM) of the Ni–Sn alloy

diffraction peak according to the Scherrer equation.  $\text{Ni}_3\text{Sn}_2(110)$  phase at  $2\theta = 30.37^\circ$ . ICP measurements were performed on an SPS 1800H plasma spectrometer of Seiko Instruments Inc. (Ni: 221.7162 nm and Sn:189.898 nm). The BET surface area ( $S_{\text{BET}}$ ) and pore volume ( $V_p$ ) were measured using  $\text{N}_2$  physisorption at 77 K on a Belsorp Max (BEL Japan). The samples were degassed at 473 K for 2 h to remove physisorbed gases prior to the measurement. The amount of nitrogen adsorbed onto the samples was used to calculate the BET surface area via the BET equation. The pore volume was estimated to be the liquid volume of nitrogen at a relative pressure of approximately 0.995 according to the Barrett–Joyner–Halenda (BJH) approach based on desorption data.<sup>7</sup>

The ammonia-temperature programmed-desorption ( $\text{NH}_3$ -TPD) was carried out on a Belsorp Max (BEL Japan). The samples were degassed at elevated temperature of 373–473 K for 2 h to remove physisorbed gases prior to the measurement. The temperature was then kept at 473 K for 2 h while flushed with He gas.  $\text{NH}_3$  gas (balanced  $\text{NH}_3$ , 80% and He, 20%) was introduced at 373 K for 30 min, then evacuated by helium gas to remove the physisorbed also for 30 min. Finally, temperature programmed desorption was carried out at temperature of 373–1073 K and the desorbed  $\text{NH}_3$  was monitored by TCD.

The  $\text{H}_2$  uptake was determined through irreversible  $\text{H}_2$  chemisorption. After the catalyst was heated at 393 K under vacuum for 30 min, it was treated at 673 K under  $\text{H}_2$  for 30 min. The catalysts were subsequently cooled to room temperature under vacuum for 30 min. The  $\text{H}_2$  measurement was conducted at 273 K, and  $\text{H}_2$  uptake was calculated according to the method described in the literatures.<sup>8,9</sup>

#### 1.4. Catalytic reaction

**FFald to 1,4-PeD.** A typical reaction of furfuraldehyde was carried out in the following manner. Furfural (1.2 mmol) in an ethanol/ $\text{H}_2\text{O}$  1.5/2.0 v/v (3.5 ml) solvent, decalin (0.25 mmol) as an internal standard, were placed into an autoclave reactor system of TAIATSU Techno (a Pyrex tube was fitted inside of a sus316 jacket to protect the vessel from corrosion in acidic media). After  $\text{H}_2$  was introduced into the reactor (initial pressure of  $\text{H}_2$  was 3.0 MPa) at room temperature, the temperature of the reactor was raised to 433 K for 12 h. After the reaction, the autoclave was cooled, the gas released slowly, the mixture was centrifuged, and the filtrate was analyzed by using gas chromatography (GC) with *trans*-decahydronaphthalene as an internal standard.

**LA to GVL and 1,4-PeD.** A typical reaction of levulinic acid was carried out in the following manner. Levulinic acid (1.2 mmol) in an  $\text{H}_2\text{O}$  (3.5 ml) solvent, decalin (0.25 mmol) as an internal standard, were placed into an autoclave reactor system of TAIATSU Techno (a Pyrex tube was fitted inside of a sus316 jacket to protect the vessel from corrosion in acidic media). After  $\text{H}_2$  was introduced into the reactor (initial pressure of  $\text{H}_2$  was 4.0 MPa) at room temperature, the temperature of the reactor was raised to 503 K for 12 h. After the reaction, the autoclave was cooled, the gas released slowly, the mixture was centrifuged, and the filtrate was analysed by using gas chromatography (GC) with *trans*-decahydronaphthalene as an internal standard.

#### 1.5. Product analysis

GC analyses were performed by a Shimadzu GC-8A with a flame ionization detector equipped with Silicone OV-101 packing (3 m). GC-MS was performed by a Shimadzu GC-17B with a thermal conductivity detector equipped with an RT-bDEXsm capillary column.  $^1\text{H}$  NMR and  $^{13}\text{C}$  NMR spectra were obtained on JNM-AL400 at 400 MHz in chloroform- $d_1$  or  $\text{D}_2\text{O}$  with TMS as an internal standard. Products were confirmed by the comparison of their GC and GC-MS retention time, mass,  $^1\text{H}$  NMR and  $^{13}\text{C}$  NMR spectra with the literatures, except for 2H2MeTHF due to the limitation of commercial availability.

## 2. Results of catalyst characterisation

**Table S1.** The bulk composition of the catalysts, H<sub>2</sub> uptakes, average Ni(111) crystallites sizes, specific surface area ( $S_{\text{BET}}$ ), and the amount of acids sites.<sup>6</sup>

| Entry | Catalyst <sup>a</sup>          | Composition <sup>a</sup><br>(mmol g <sup>-1</sup> ) |      |      | H <sub>2</sub> uptake <sup>b</sup><br>( $\mu\text{mol g}^{-1}$ ) | $D_{\text{Ni}}$ <sup>c</sup><br>(nm) | $S_{\text{BET}}$ <sup>d</sup><br>(m <sup>2</sup> g <sup>-1</sup> ) | Amount of acid<br>site <sup>e</sup> ( $\mu\text{mol g}^{-1}$ ) |
|-------|--------------------------------|-----------------------------------------------------|------|------|------------------------------------------------------------------|--------------------------------------|--------------------------------------------------------------------|----------------------------------------------------------------|
|       |                                | Ni                                                  | Al   | Sn   |                                                                  |                                      |                                                                    |                                                                |
| 1     | Raney®Ni                       | 3.98                                                | 0.63 | -    | 121                                                              | 8.6                                  | 66                                                                 | 195 <sup>10</sup>                                              |
| 2     | Raney® Ni/AlOH                 | 3.46                                                | 3.80 | -    | 104                                                              | 8.8                                  | 151                                                                | 474                                                            |
| 3     | RNi-Sn(14.7)/AlOH              | 3.82                                                | 3.66 | 0.26 | 103                                                              | 7.0                                  | 90                                                                 | 477                                                            |
| 4     | RNi-Sn(7.9)/AlOH               | 3.58                                                | 3.44 | 0.45 | 101                                                              | 6.2                                  | 77                                                                 | 487                                                            |
| 5     | RNi-Sn(3.7)/AlOH               | 3.77                                                | 3.52 | 0.76 | 94                                                               | 5.9                                  | 76                                                                 | 488                                                            |
| 6     | RNi-Sn(3.0)/AlOH               | 3.13                                                | 4.91 | 1.04 | 110                                                              | 5.3                                  | 145                                                                | 491                                                            |
| 7     | RNi-Sn(1.4)/AlOH               | 3.01                                                | 3.48 | 2.14 | 103                                                              | 4.8                                  | 76                                                                 | 489                                                            |
| 8     | RNi-Sn(1.0)/AlOH               | 3.54                                                | 3.71 | 3.96 | 98                                                               | 4.6                                  | 72                                                                 | 490                                                            |
| 9     | $\gamma\text{-Al}_2\text{O}_3$ | -                                                   | -    | -    | -                                                                | -                                    | 100                                                                | 180 <sup>11</sup>                                              |

<sup>a</sup>Values in the parenthesis are Sn loading amount, the bulk compositions are determined by ICP-AES. <sup>b</sup>Based upon total the H<sub>2</sub> uptake at 273 K (after corrections for physical and chemical adsorption). <sup>c</sup>Average Ni(111) or Ni-Sn crystallite sizes were calculated from the full width at the half maximum (FWHM) of the Ni(111) diffraction peak according to the Scherrer's equation. <sup>d</sup>Determined by N<sub>2</sub> adsorption at 77 K. <sup>e</sup>Amount of acidic sites ( $\mu\text{mol. g}^{-1}$ ) was derived from the NH<sub>3</sub>-TPD spectra.

**Table S2.** Physico-chemical properties of synthesized RNi–Sn(*x*)/AA catalysts (*x* = Ni/Sn molar ratio; 3.0, 1.4, and 1.0) after reduction with H<sub>2</sub> at different temperature of 673–873 K for 1.5 h.<sup>12</sup>

| Entry | Catalysts <sup>a</sup> | $S_{\text{BET}}^{\text{b}}$<br>(m <sup>2</sup> g <sup>-1</sup> ) | $V_{\text{p}}^{\text{b}}$<br>(cm <sup>3</sup> g <sup>-1</sup> ) | $d_{\text{pore}}^{\text{b}}$<br>(nm) | H <sub>2</sub> uptake <sup>c</sup><br>(μmol.g <sup>-1</sup> ) | $S_{\text{Ni}}^{\text{c}}$<br>(m <sup>2</sup> g <sup>-1</sup> cat) | $D^{\text{d}}/\text{nm}$ |
|-------|------------------------|------------------------------------------------------------------|-----------------------------------------------------------------|--------------------------------------|---------------------------------------------------------------|--------------------------------------------------------------------|--------------------------|
| 1     | RNi–Sn(3.0)/AA 673 K   | 42                                                               | 0.079                                                           | 2.8                                  | 81                                                            | 35.2                                                               | nd                       |
| 2     | RNi–Sn(3.0)/AA 773 K   | 72                                                               | 0.065                                                           | 3.6                                  | 67                                                            | 31.8                                                               | nd                       |
| 3     | RNi–Sn(3.0)/AA 873 K   | 122                                                              | 0.098                                                           | 3.2                                  | 53                                                            | 22.7                                                               | nd                       |
| 4     | RNi–Sn(1.4)/AA 673 K   | 50                                                               | 0.065                                                           | 3.2                                  | 45                                                            | 13.6                                                               | 14.7                     |
| 5     | RNi–Sn(1.4)/AA 773 K   | 27                                                               | 0.063                                                           | 9.3                                  | 32                                                            | 9.4                                                                | 16.6                     |
| 6     | RNi–Sn(1.4)/AA 873 K   | 26                                                               | 0.073                                                           | 11.2                                 | 17                                                            | 5.1                                                                | 28.4                     |
| 7     | RNi–Sn(1.0)/AA 673 K   | 26                                                               | 0.040                                                           | 4.9                                  | 66                                                            | 32.1                                                               | nd                       |
| 8     | RNi–Sn(1.0)/AA 773 K   | 61                                                               | 0.086                                                           | 5.7                                  | 59                                                            | 24.4                                                               | nd                       |
| 9     | RNi–Sn(1.0)/AA 873 K   | 126                                                              | 0.079                                                           | 5.6                                  | 56                                                            | 21.3                                                               | nd                       |

<sup>a</sup>The value in the parenthesis is Ni/Sn molar ratio. The composition was determined by using ICP-AES.

<sup>b</sup>Determined by N<sub>2</sub> adsorption at 77 K. <sup>c</sup>Based on total H<sub>2</sub> uptake at 273 K (noted after corrected for physical and chemical adsorption). <sup>d</sup>Average crystallite sizes of Ni<sub>3</sub>Sn<sub>2</sub>(101) alloy phases at 2θ = 30.37°, calculated by using Scherer equation; n.d. = not determined.

**Table S3.** Results of catalytic conversion of FFald to 1,4-PeD over various bimetallic RANEY® Ni-based supported on aluminium hydroxide (AlOH) catalysts

| Entry | Catalyst    | Conv. <sup>a</sup> (%) | Yield <sup>b</sup> (%) |         |         |       |        |          |         |                     |
|-------|-------------|------------------------|------------------------|---------|---------|-------|--------|----------|---------|---------------------|
|       |             |                        | 1,4-PeD                | 1,2-PeD | 1,5-PeD | FFalc | THFalc | 2H2MeTHF | 2-MeTHF | Others <sup>c</sup> |
| 1     | RNi-Fe/AlOH | 100                    | 0                      | 2       | 3       | 0     | 80     | 0        | 15      | 0                   |
| 2     | RNi-Co/AlOH | 100                    | 0                      | 0       | 0       | 0     | 100    | 0        | 0       | 0                   |
| 3     | RNi-In/AlOH | 100                    | 0                      | 0       | 0       | 99    | 1      | 0        | 0       | 0                   |
| 4     | RNi-Ag/AlOH | 100                    | 0                      | 0       | 0       | 0     | 98     | 0        | 2       | 0                   |
| 5     | RNi-Ga/AlOH | 100                    | 0                      | 0       | 0       | 99    | 0      | 0        | 1       | 0                   |
| 6     | RNi-Zr/AlOH | 100                    | 0                      | 0       | 0       | 0     | 87     | 0        | 13      | 0                   |
| 7     | RNi-V/AlOH  | 100                    | 0                      | 0       | 0       | 0     | 99     | 0        | 1       | 0                   |
| 8     | RNi-Nb/AlOH | 100                    | 0                      | 0       | 0       | 0     | 98     | 0        | 2       | 0                   |

Reaction conditions: catalyst, 44 mg; substrate, 1.2 mmol; solvent, ethanol/H<sub>2</sub>O, 3.5 ml (1.5 : 2.0 volume ratio); initial H<sub>2</sub> pressure, 3.0 MPa, 433 K, 12 h. <sup>a</sup>Conversion of FFald was determined by GC analysis using an internal standard technique. <sup>b</sup>Yield of product was determined by GC and GC-MS analyses using an internal standard technique. <sup>c</sup>It may be the dimerization product of FFalc according to GC and GC-MS data. **FFald** = furfuraldehyde. **PeD** = pentanediol. **FFalc** = furfuryl alcohol. **THFalc** = tetrahydrofurfuryl alcohol. **2H2MeTHF** = 2-hydroxy-2-methyl tetrahydrofuran. **2-MeTHF** = 2-methyl tetrahydrofuran.

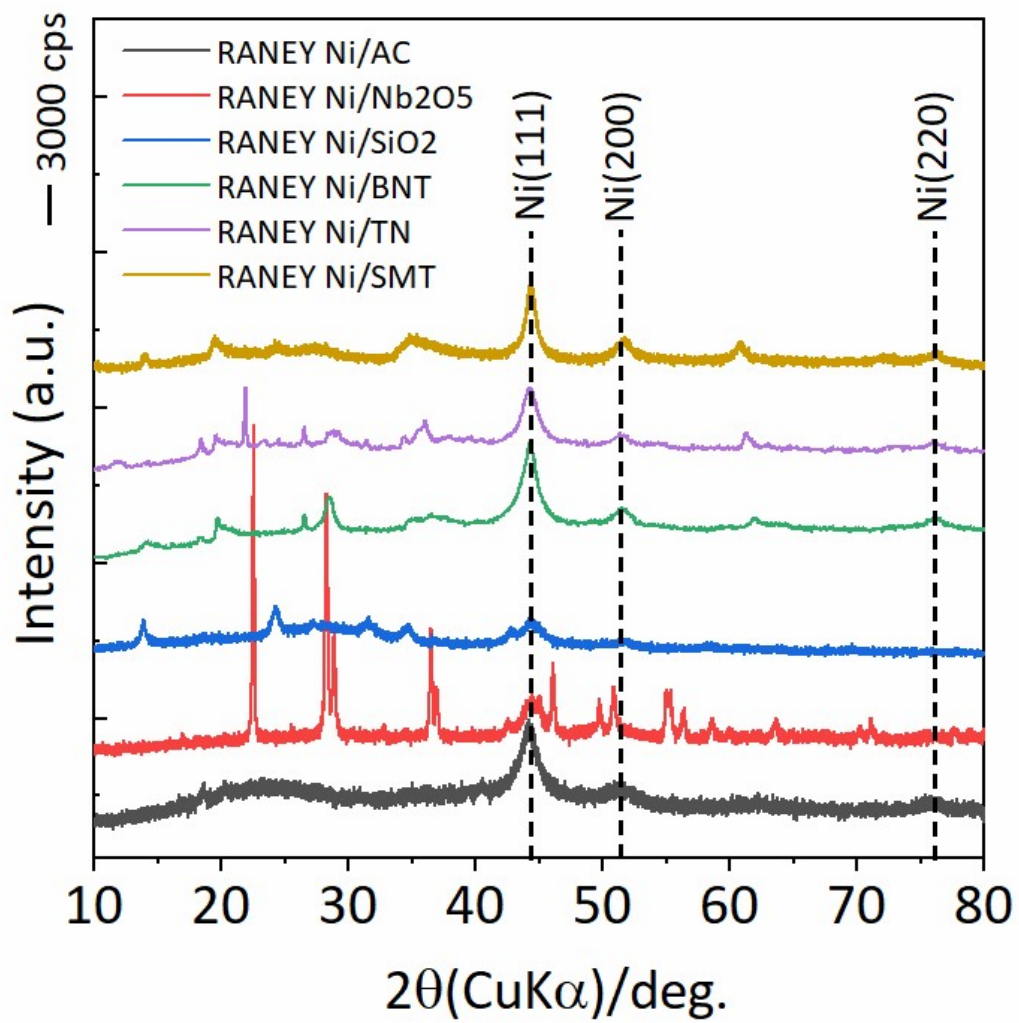

Fig. S1 XRD patterns of various supported RANEY® Ni catalysts.

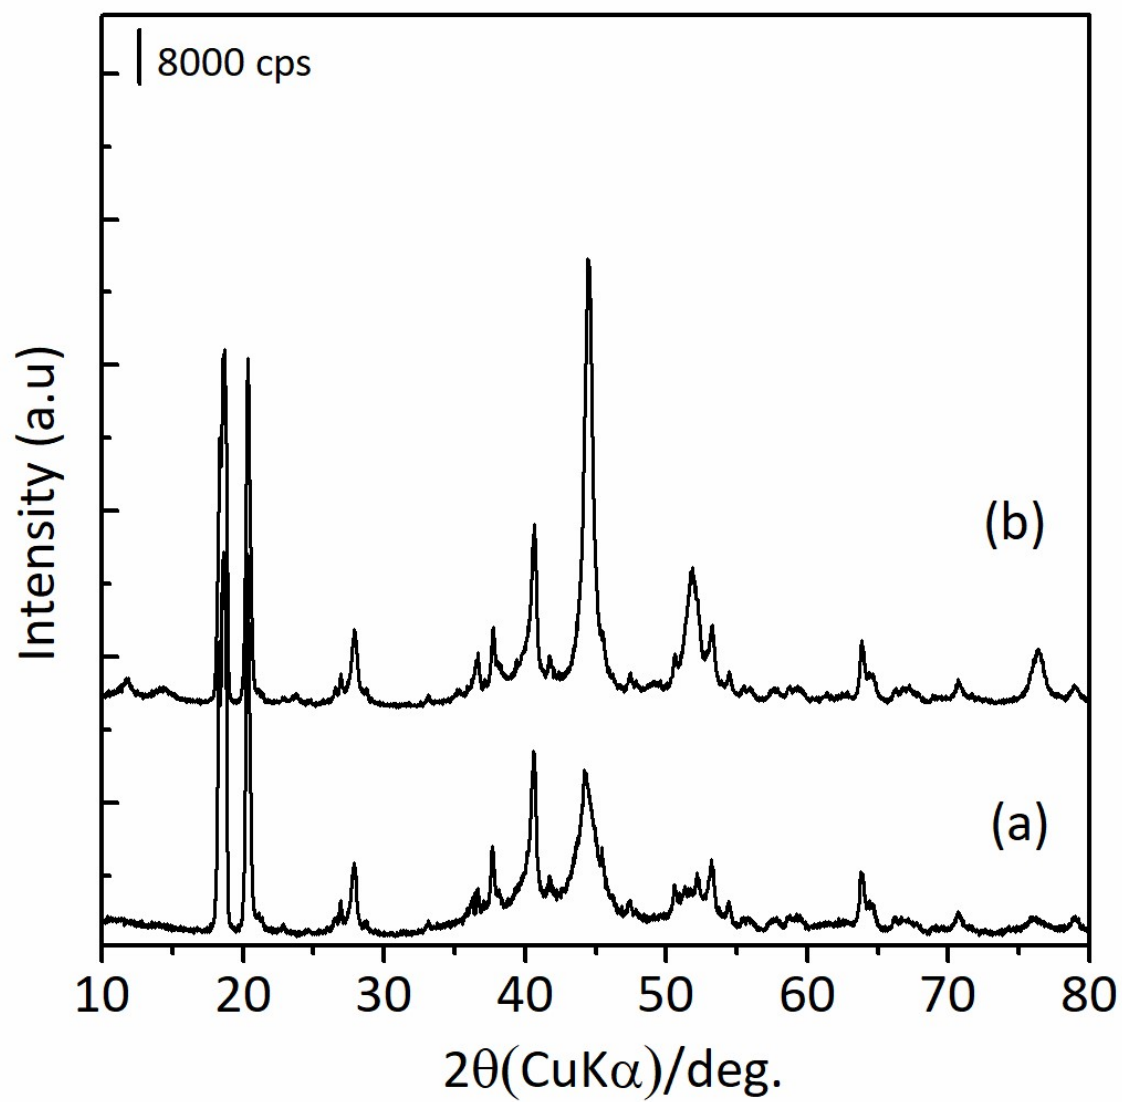

**Fig. S2** XRD patterns of the as-prepared RANEY® Ni/AlOH catalyst (a) without and (b) with hydrothermally treated at 423 K for 2 h.



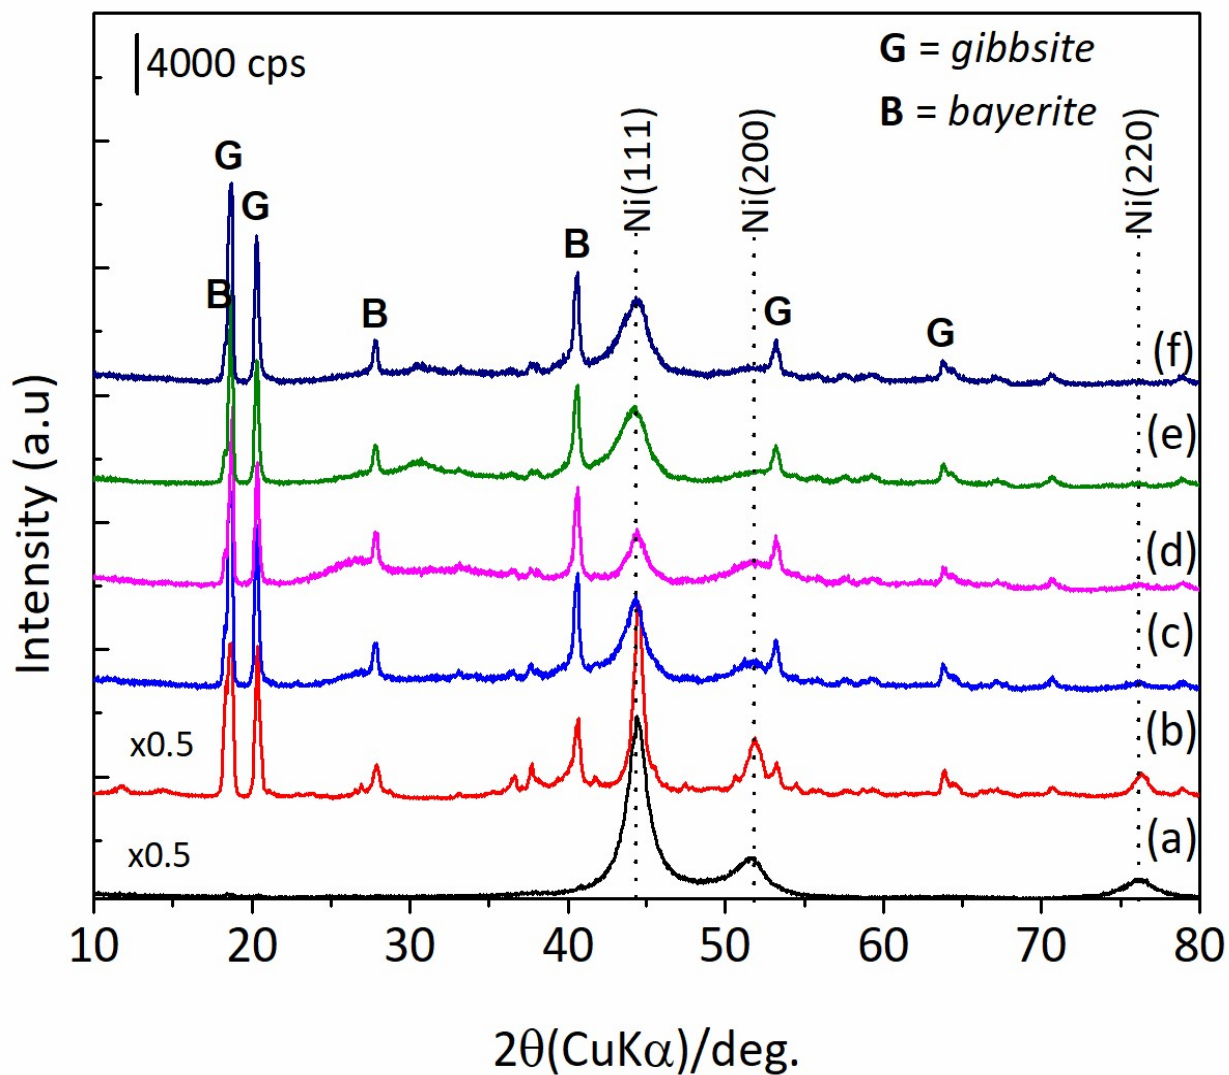

**Fig. S3.** The XRD patterns of (a) RANEY®Ni, (b) RNi/AlOH, and RNi-Sn(x)/AlOH with different Ni/Sn molar ratio Sn loading amount of (c) 3.7, (d) 3.0, (e) 1.4, and (f) 1.0 obtained after hydrothermal synthesis at 423 K for 2 h.

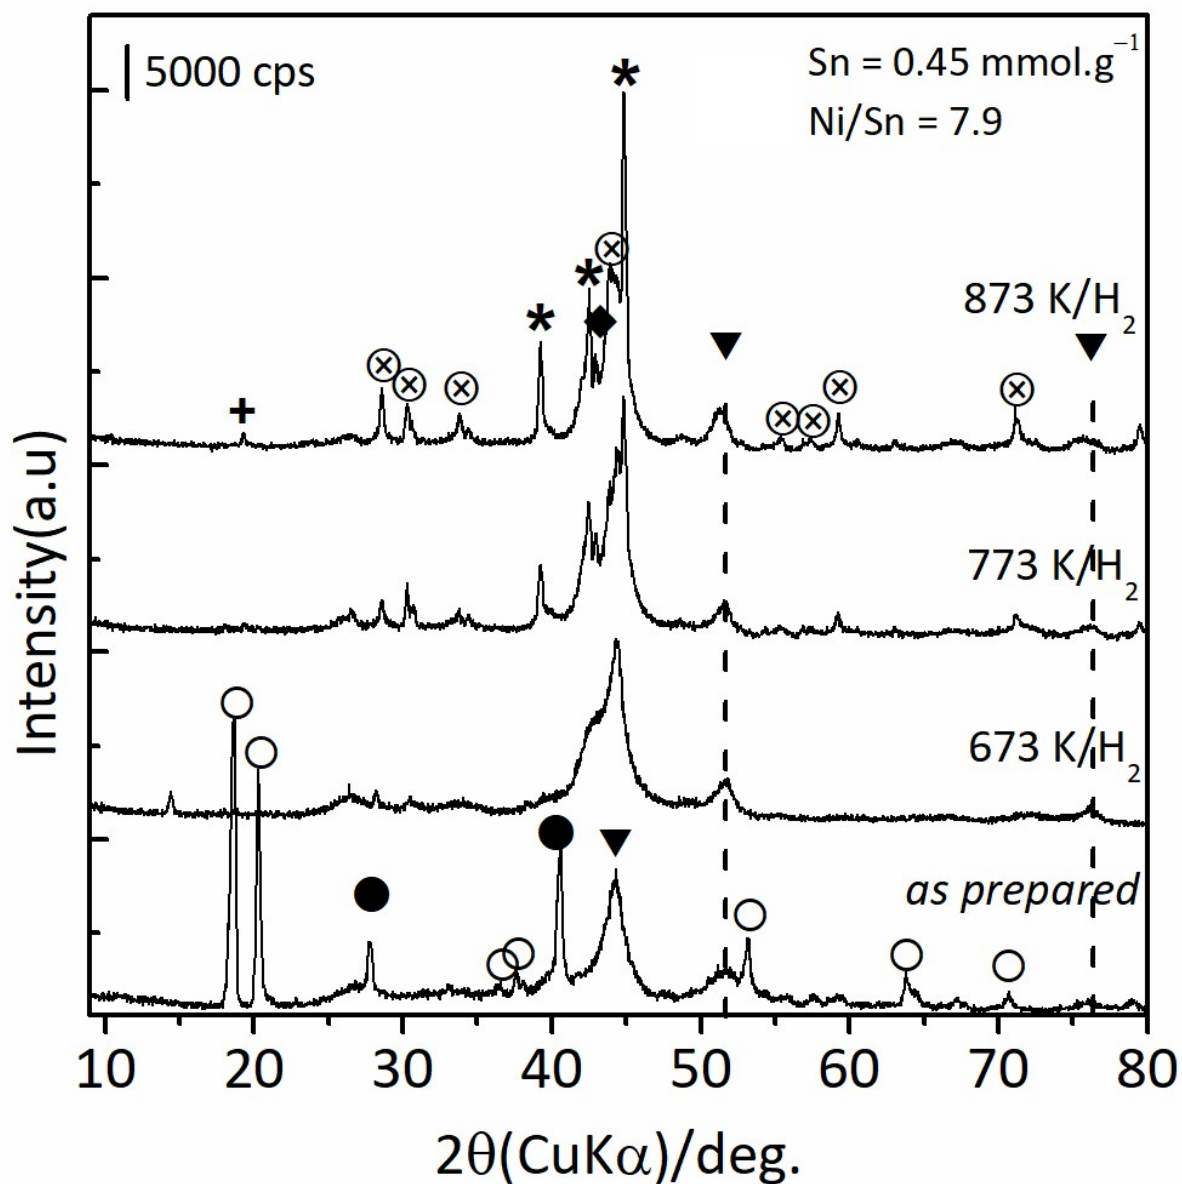

**Fig. S4** XRD patterns of as-prepared Ni-Sn(7.9)/AlOH catalyst and after reduction with  $\text{H}_2$  at 673-873 K for 1.5 h. (○) Gibbsite. (●) Bayerite. (➤)  $\text{Ni}_3\text{Sn}$ . (➤)  $\text{Ni}_3\text{Sn}_2$ . (⊗) Ni(0). (+)  $\beta\text{-Sn}$ .<sup>13,14</sup>

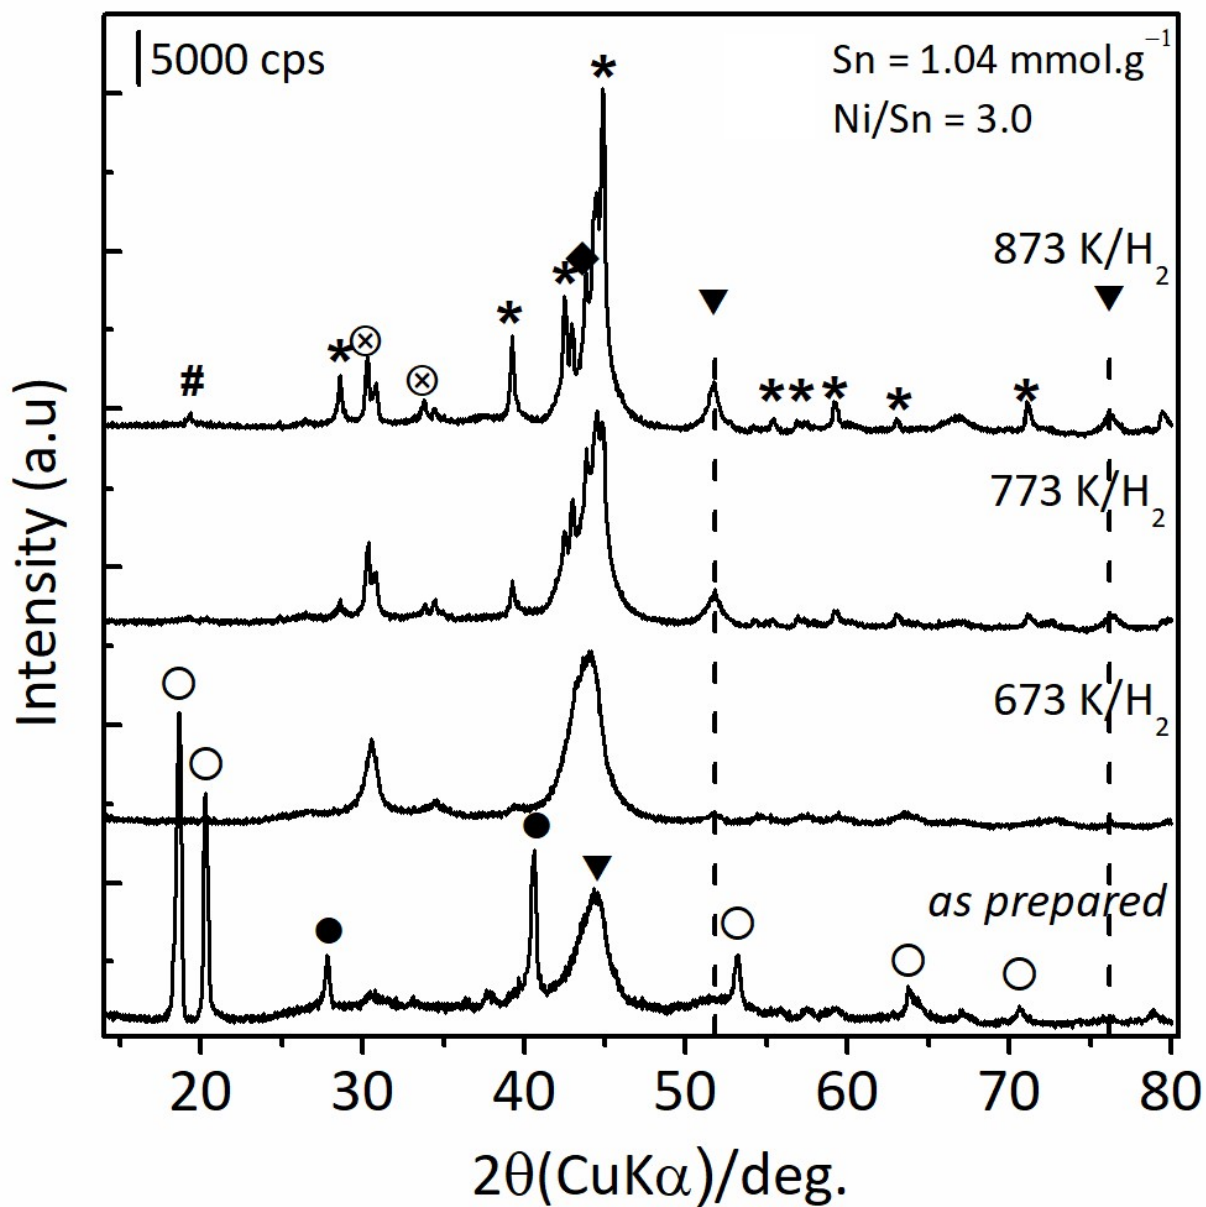

**Fig. S5** XRD patterns of as-prepared Ni-Sn(3.0)/AlOH catalyst and after reduction with H<sub>2</sub> at 673-873 K for 1.5 h. (○) Gibbsite. (●) Bayerite. (➤) Ni<sub>3</sub>Sn. (▼) Ni<sub>3</sub>Sn<sub>2</sub>. (⊗) Ni(O). (+) β-Sn.<sup>13,14</sup>

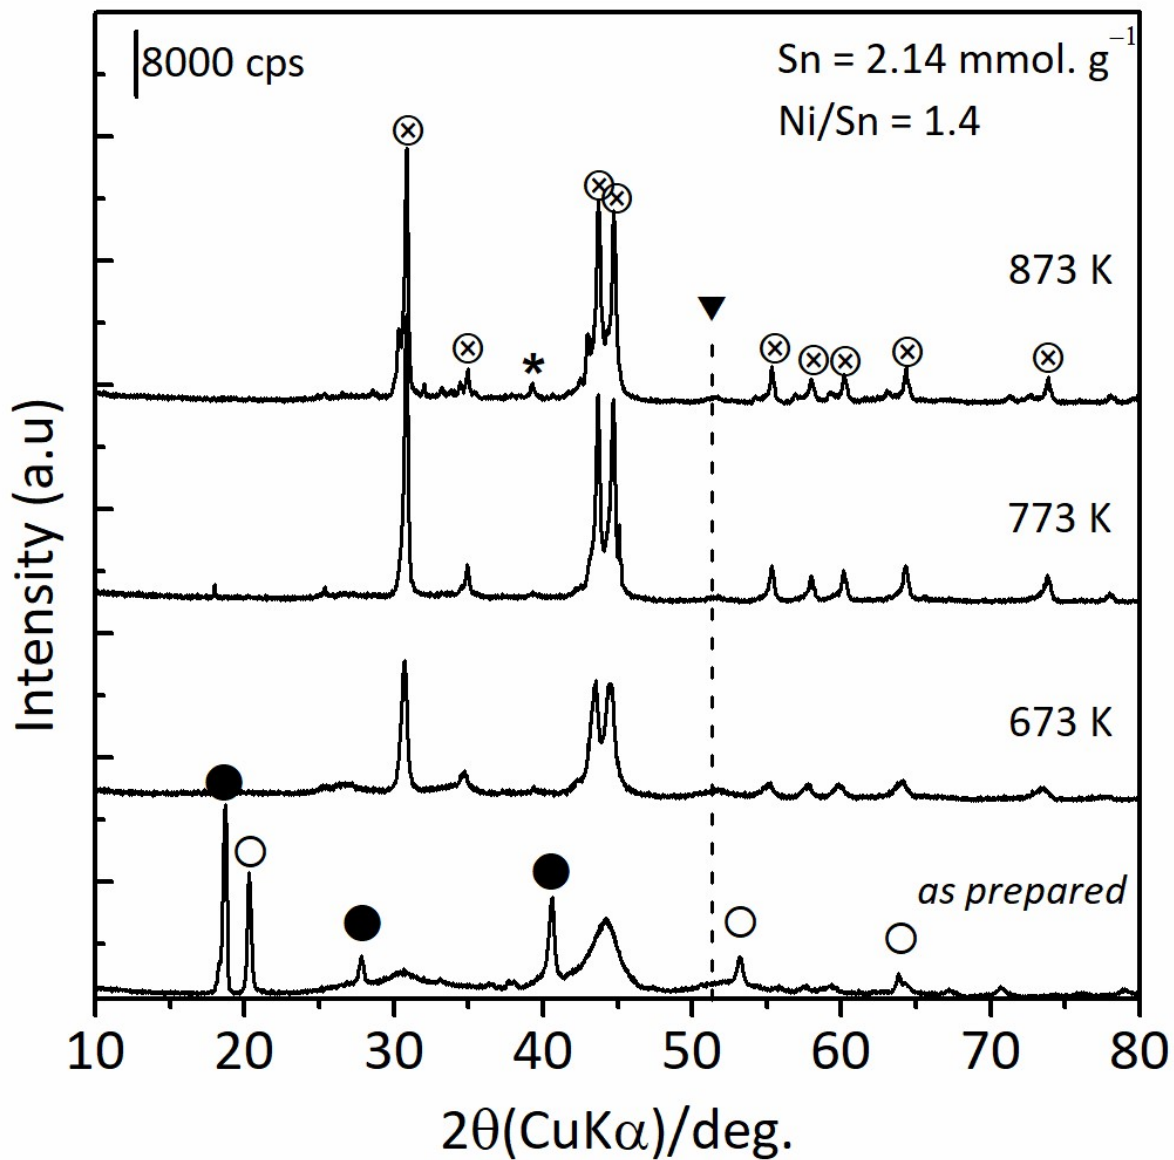

**Fig. S6** XRD patterns of as-prepared Ni-Sn(1.4)/AlOH catalyst and after reduction with H<sub>2</sub> at 673-873 K for 1.5 h. (○) Gibbsite. (●) Bayerite. (➤) Ni<sub>3</sub>Sn. (⊕) Ni<sub>3</sub>Sn<sub>2</sub>. (⊙) Ni(0). (+) β-Sn.<sup>13,14</sup>

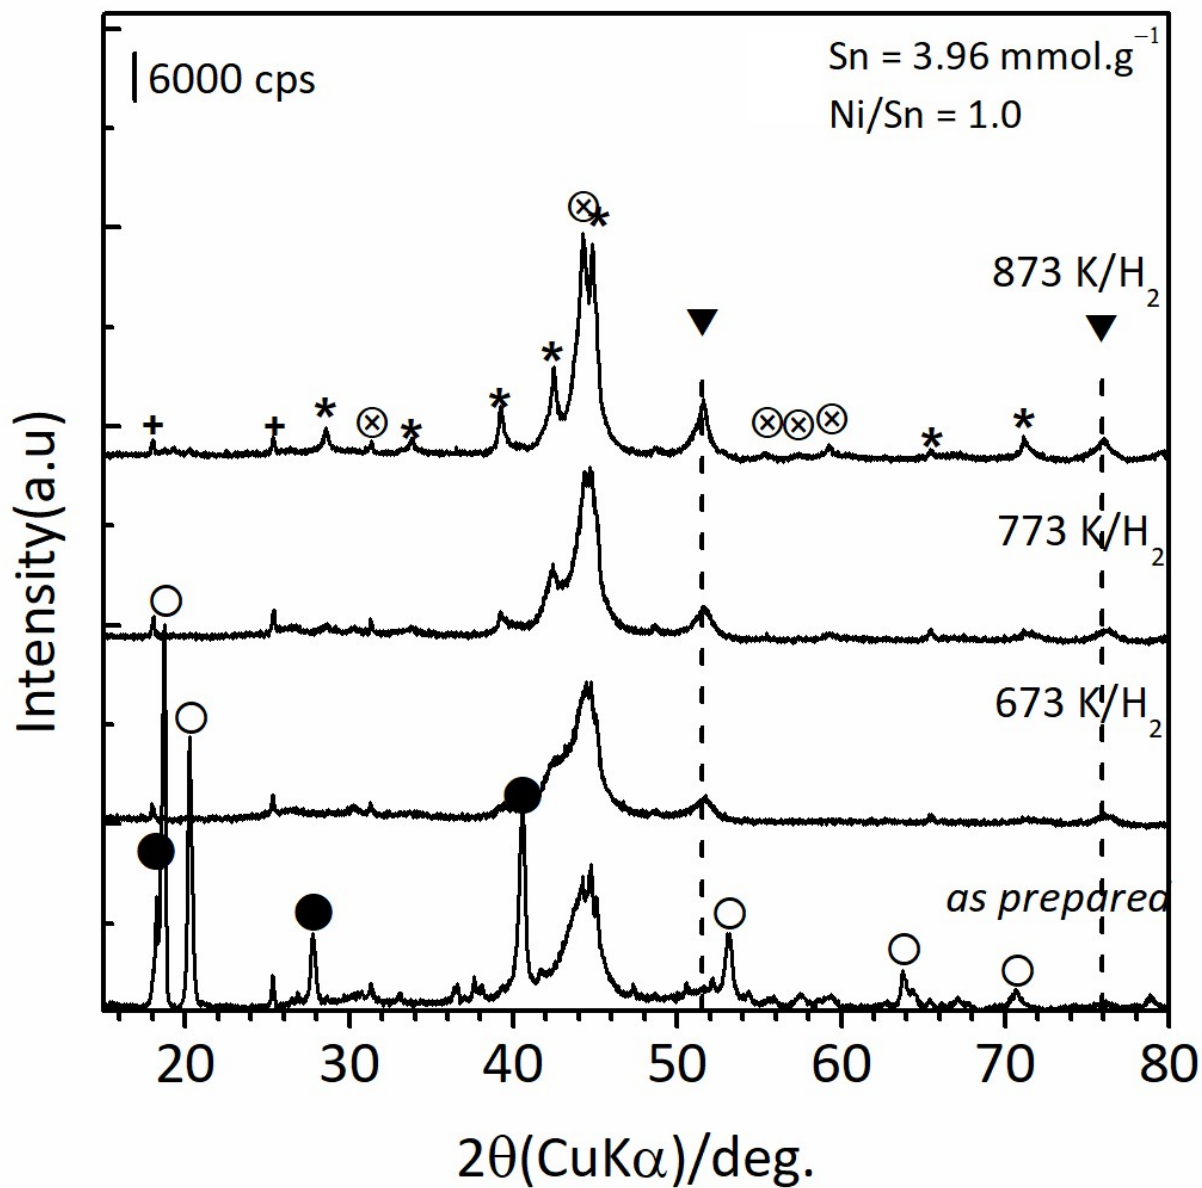

**Fig. S7** XRD patterns of the as-prepared Ni-Sn(1.0)/AlOH catalyst and after reduction with H<sub>2</sub> at 673-873 K for 1.5 h. (○) Gibbsite. (●) Bayerite. (▼) Ni<sub>3</sub>Sn. (⊗) Ni<sub>3</sub>Sn<sub>2</sub>. (⊙) Ni(O). (+) β-Sn<sup>13,14</sup>

**Table S4.** Results of catalytic conversion of FFald to 1,4-PeD over RNi–Sn(x)/AA (x = Ni/Sn molar ratio; 7.9, 3.7, and 1.0) after reduction with H<sub>2</sub> at 673-873 K for 1.5 h

| Entry | Catalyst <sup>a</sup>             | Conv. <sup>b</sup><br>(%) | Yield (%) <sup>c</sup> |         |         |       |        |          |         |                     |
|-------|-----------------------------------|---------------------------|------------------------|---------|---------|-------|--------|----------|---------|---------------------|
|       |                                   |                           | 1,4-PeD                | 1,2-PeD | 1,5-PeD | FFalc | THFalc | 2H2MeTHF | 2-MeTHF | Others <sup>d</sup> |
| 1     | RNi–Sn(7.9)/AA 673/H <sub>2</sub> | 100                       | 26                     | 0       | 0       | 0     | 67     | 7        | 0       | 0                   |
| 2     | RNi–Sn(7.9)/AA 773/H <sub>2</sub> | 100                       | 29                     | 0       | 0       | 0     | 64     | 7        | 0       | 0                   |
| 3     | RNi–Sn(7.9)/AA 873/H <sub>2</sub> | 100                       | 39                     | 0       | 0       | 0     | 52     | 9        | 0       | 0                   |
| 4     | RNi–Sn(3.7)/AA 673/H <sub>2</sub> | 100                       | 51                     | 3       | 0       | 0     | 9      | 35       | 1       | 1                   |
| 5     | RNi–Sn(3.7)/AA 773/H <sub>2</sub> | 100                       | 55                     | 4       | 2       | 0     | 4      | 35       | 0       | 0                   |
| 6     | RNi–Sn(3.7)/AA 873/H <sub>2</sub> | 100                       | 32                     | 9       | 2       | 0     | 14     | 42       | 0       | 1                   |
| 7     | RNi–Sn(1.0)/AA 673/H <sub>2</sub> | 100                       | 42                     | 1       | 6       | 0     | 25     | 23       | 2       | 1                   |
| 8     | RNi–Sn(1.0)/AA 773/H <sub>2</sub> | 100                       | 46                     | 0       | 0       | 0     | 25     | 25       | 2       | 2                   |
| 9     | RNi–Sn(1.0)/AA 873/H <sub>2</sub> | 100                       | 49                     | 2       | 0       | 0     | 22     | 26       | 1       | 0                   |

Reaction conditions: catalyst, 44 mg; substrate, 1.2 mmol; solvent, ethanol/H<sub>2</sub>O, 3.5 ml (1.5: 2.0 volume ratio); initial H<sub>2</sub> pressure, 3.0 MPa; 433 K, 12 h. <sup>a</sup>Values in the parentheses are the Sn loading amounts. The compositions were determined by the ICP-AES analysis. <sup>b</sup>Conversion of FFald was determined by GC analysis using an internal standard technique. <sup>c</sup>Yield of the product was determined by GC and GC-MS analyses using an internal standard technique. <sup>d</sup>Others include 2-methyltetrahydrofuran (2-MeTHF) and condensation product of FFalc, unless otherwise stated. **FFald** = furfuraldehyde. **PeD** = pentanediol. **FFalc** = furfuryl alcohol. **THFalc** = tetrahydrofurfuryl alcohol. **2H2MeTHF** = 2-hydroxy-2-methyl tetrahydrofuran. **2-MeTHF** = 2-methyl tetrahydrofuran.

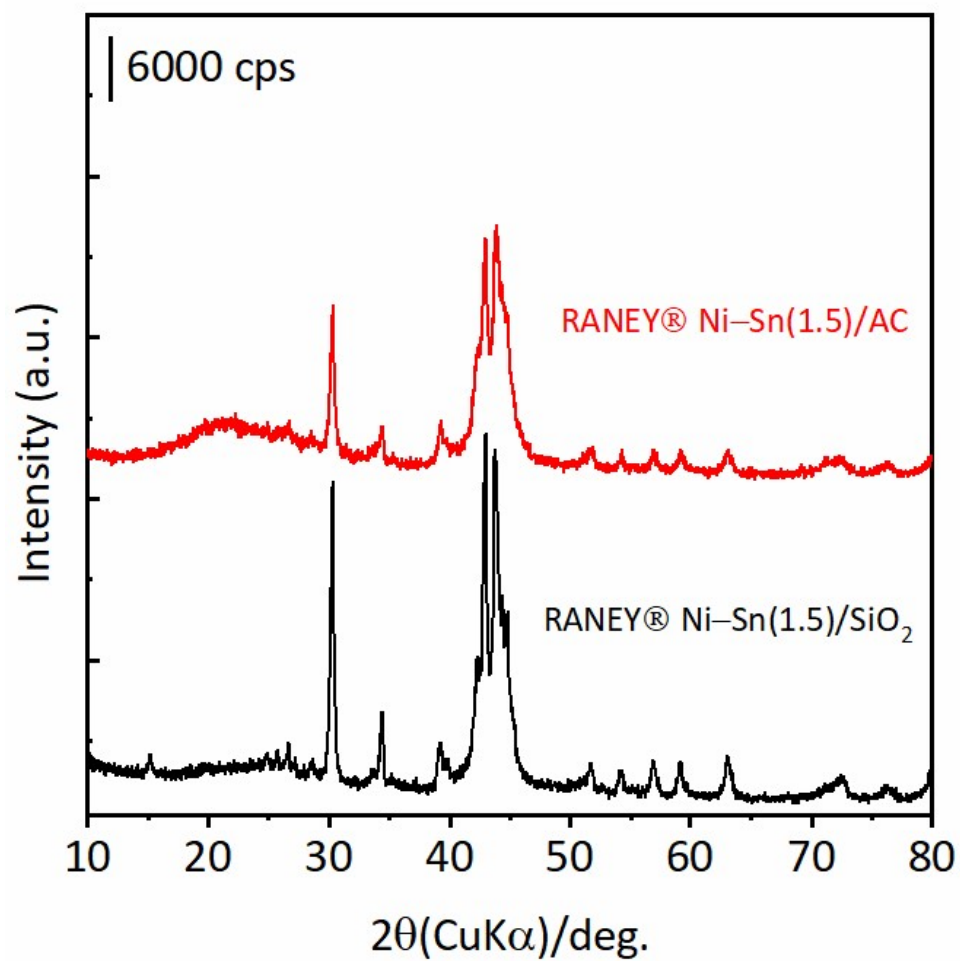

**Fig. S8** XRD patterns of the RANEY® Ni-Sn(1.5)/C and RANEY® Ni-Sn(1.5)/SiO<sub>2</sub> catalysts after reduction with H<sub>2</sub> at 673 K for 1.5 h.

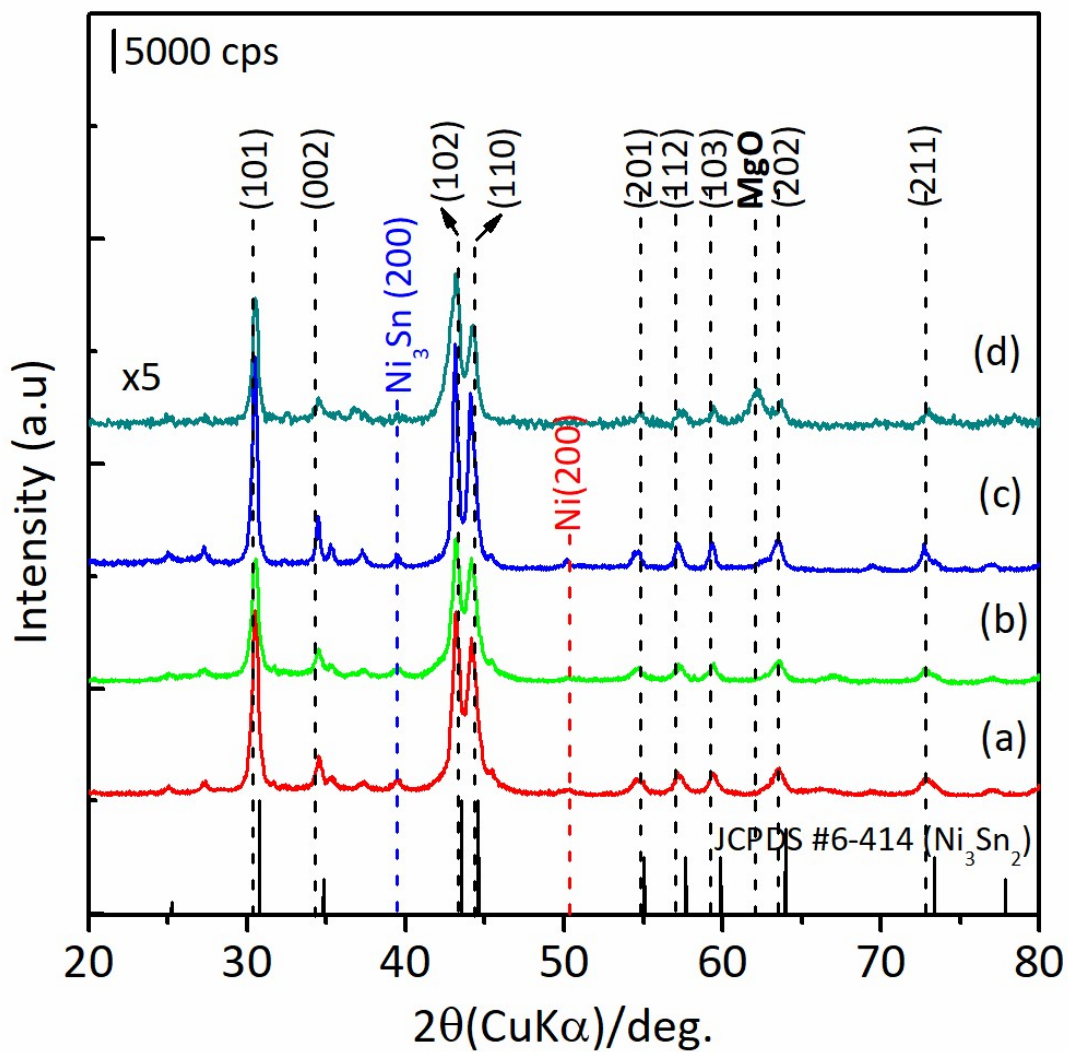

**Fig. S9** The XRD patterns of various supported Ni-Sn(1.5) ( $\text{Ni}_3\text{Sn}_2$ ) (a)  $\text{c-AlOH}$ , (b)  $\gamma\text{-Al}_2\text{O}_3$ , (c) active carbon (AC), and (d) MgO after reduction with  $\text{H}_2$  at 673 K for 1.5 h. The plotted data were compared with JCPDS card of #06-414 ( $\text{Ni}_3\text{Sn}_2$ ).



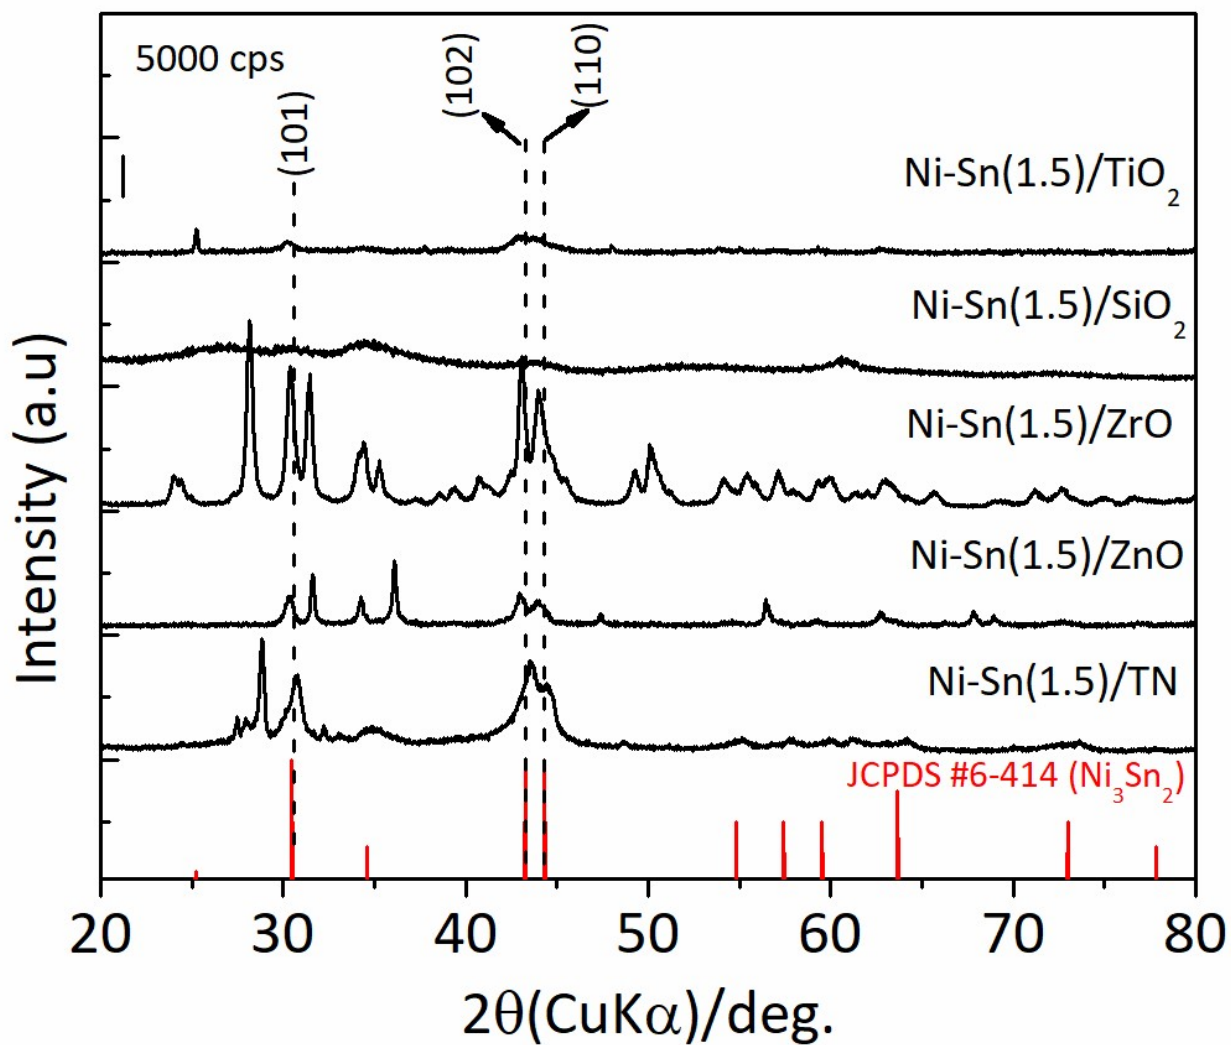

**Fig. S10** XRD patterns of various supported Ni-Sn(1.5) ( $\text{Ni}_3\text{Sn}_2$ ) catalysts after reduction with  $\text{H}_2$  at 673 K for 1.5 h. The plotted data were compared with JCPDS card of #06-414 ( $\text{Ni}_3\text{Sn}_2$ ).

**Table S5** Results of the selective synthesis of 1,4-PeD from FFald using various supported Ni–Sn(1.5) (Ni<sub>3</sub>Sn<sub>2</sub>) alloy catalysts

| Entry | Catalyst <sup>a</sup>       | Conv. <sup>b</sup><br>(%) | Yield <sup>c</sup> (%) |         |         |       |        |          |         |                     |
|-------|-----------------------------|---------------------------|------------------------|---------|---------|-------|--------|----------|---------|---------------------|
|       |                             |                           | 1,4-PeD                | 1,2-PeD | 1,5-PeD | FFalc | THFalc | 2H2MeTHF | 2-MeTHF | Others <sup>d</sup> |
| 1     | Ni–Sn(1.5)/SiO <sub>2</sub> | 98                        | 0                      | 0       | 3       | 72    | 21     | 2        | 2       | 0                   |
| 2     | Ni–Sn(1.5)/ZrO <sub>2</sub> | >99                       | 0                      | 2       | 1       | 54    | 42     | 0        | 1       | 0                   |
| 3     | Ni–Sn(1.5)/TN               | >99                       | 0                      | 0       | 0       | 0     | 90     | 0        | 3       | 7                   |
| 4     | Ni–Sn(1.5)/MCM-41           | >99                       | 0                      | 0       | 0       | 0     | 91     | 0        | 5       | 4                   |

**Reaction conditions:** catalyst, 44 mg; substrate, 1.2 mmol; solvent, ethanol/H<sub>2</sub>O, 3.5 ml (1.5 : 2.0 volume ratio); initial H<sub>2</sub> pressure, 3.0 MPa, 433 K, 12 h. <sup>a</sup>Values in the parenthesis are Ni/Sn molar ratio, determined by using ICP-OES. <sup>b</sup>Conversion of FFald was determined by GC analysis using an internal standard technique. <sup>c</sup>Yield of product was determined by GC and GC-MS analyses using an internal standard technique. <sup>d</sup>Unknown product may be the condensation product of FFald or FFalc according to GC and GC-MS data. **PeD** = pentanediol. **FFalc** = furfuryl alcohol. **THFalc** = tetrahydrofurfuryl alcohol. **2H2MeTHF** = 2-hydroxy-2-methyl tetrahydrofuran. **2-MeTHF** = 2-methyl tetrahydrofuran.

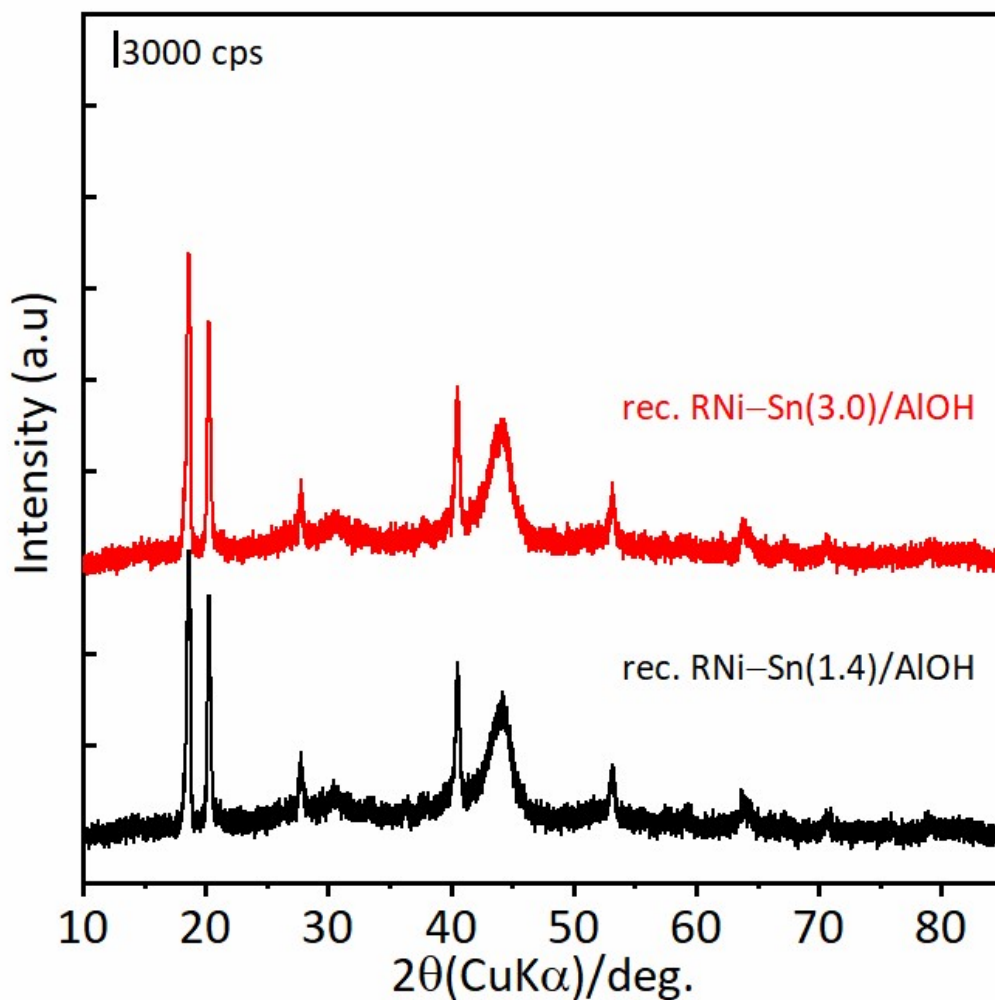

**Fig. S11.** XRD patterns of recovered RNi-Sn(3.0)/AlOH and RNi-Sn(1.4)/AlOH after the fifth run of reusability tests in the catalytic conversion of FFald to 1,4-PeD. The recovered catalysts were dried in vacuo at room temperature for overnight.

#### References

- 1 J. Petró, L. Hegedus and I. E. Sajó, *Appl. Catal. A Gen.*, 2006, **308**, 50–55.
- 2 R. Rodiansono, T. Hara and S. Shimazu, *Indones. J. Chem.*, 2013, **13**, 101–107.
- 3 R. Rodiansono, M. D. Astuti, D. R. Mujiyanti and U. T. Santoso, *Indones. J. Chem.*, 2019, **19**, 183–190.
- 4 R. Rodiansono and S. Shimazu, *Bull. Chem. React. Eng. Catal.*, 2013, **8**, 40–46.
- 5 R. Rodiansono, T. Hara, N. Ichikuni and S. Shimazu, *Bull. Chem. React. Eng. Catal.*, 2014, **9**, 53–59.
- 6 R. Rodiansono, T. Hara, N. Ichikuni and S. Shimazu, *Chem. Lett.*, 2012, **41**, 769–771.
- 7 S. Lowell, J. E. Shields, M. A. Thomas and M. Thommes, *Characterization of Porous Solids and Powders: Surface Area, Pore Size and Density*, Kluwer Academic Publishers: Dordrecht, The Netherlands., 2004.
- 8 C. H. Bartholomew and R. B. Pannell, *J. Catal.*, 1980, **65**, 390–401.
- 9 C. H. Bartholomew, R. B. Pannell and J. L. Butter, *J. Catal.*, 1980, **65**, 335–347.
- 10 C. Liu, R. Hou and T. Wang, *RSC Adv.*, 2015, **5**, 26465–26474.
- 11 B. C. Miranda, R. J. Chimentão, J. B. O. Santos, F. Gispert-Guirado, J. Llorca, F. Medina, F. L. Bonillo and J. E.

- Sueiras, *Appl. Catal. B Environ.*, 2014, **147**, 464–480.
- 12 R. Rodiansono, M. D. Astuti, K. Mustikasari, S. Husain and Sutomo, *Catal. Sci. Technol.*, 2020, **10**, 7768–7778.
- 13 JCPDS-ICDD, *Powder diffraction files, JCPDS-International center for diffraction data (JCPDS-ICDD)*, 1991.
- 14 C. Schmetterer, H. Flandorfer, K. W. Richter, U. Saeed, M. Kauffman, P. Roussel and H. Ipser, *Intermetallics*, 2007, **15**, 869–884.
